# Supplementary material for: ZnO nanorod/nickel phthalocyanine hierarchical hetero-nanostructures with superior visible light photocatalytic properties assisted by H2O2
Source: Royal Society of Chemistry journal article supplement (doi:10.1039/c5ra15821d), 2015-01-01
Supplement: c5ra15821d1.pdf [file c5ra15821d1.pdf]

## Figures Supporting

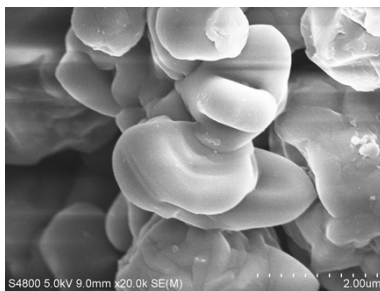

**Fig. S1** FESEM images of TPNiPc obtained directly without the zinc foil (other conditions without changed).

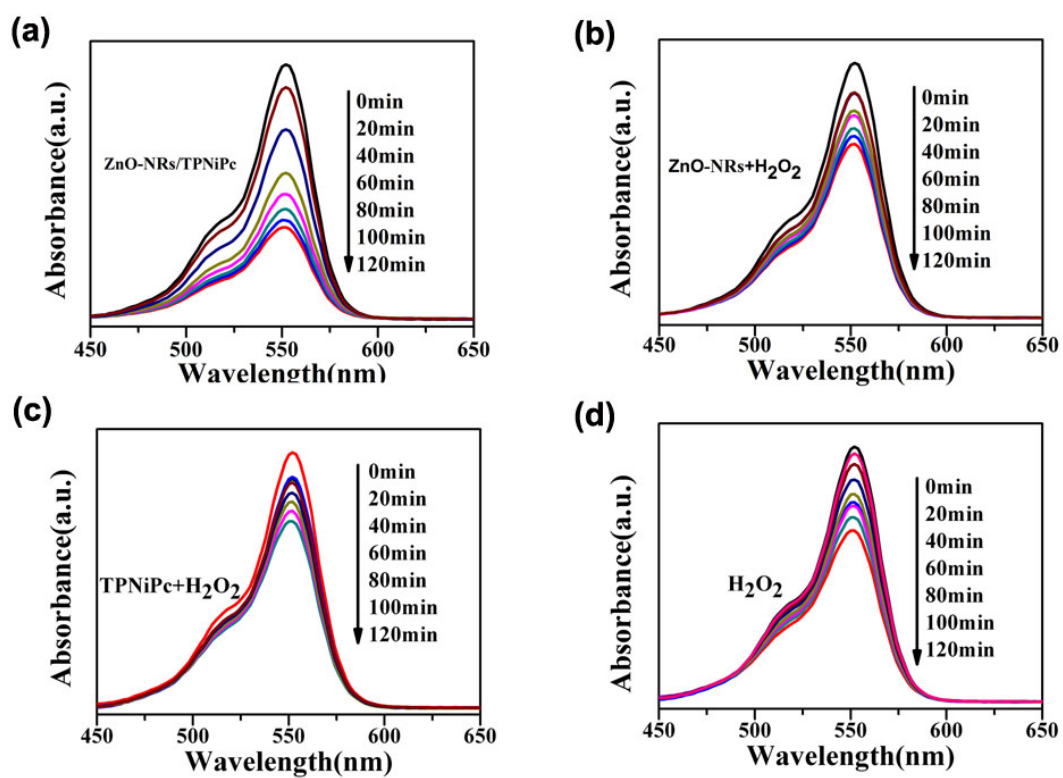

**Fig. S2** Absorption spectra of the RhB solution under visible light irradiation by (a) ZnO-NRs/TPNiPc hierarchical hetero-nanostructures without H<sub>2</sub>O<sub>2</sub>, (b) ZnO-NRs assisted with H<sub>2</sub>O<sub>2</sub>, (c) TPNiPc assisted with H<sub>2</sub>O<sub>2</sub> and (d) pure H<sub>2</sub>O<sub>2</sub>.
